# Supplementary material for: Superagonist IL-15-Armed Oncolytic Virus Elicits Potent Antitumor Immunity and Therapy That Are Enhanced with PD-1 Blockade
Source: PubMed Central journal article supplement — Mol Ther. 2018 Jul 17;26(10):2476–86. doi: 10.1016/j.ymthe.2018.07.013 (PMC6171074; doi:10.1016/j.ymthe.2018.07.013), 2018-07-17
Supplement: mmc1.pdf [file mmc1.pdf]

YMTHE, Volume 26

## **Supplemental Information**

### **Superagonist IL-15-Armed Oncolytic Virus Elicits Potent Antitumor Immunity and Therapy That Are Enhanced with PD-1 Blockade**

**Stacy J. Kowalsky, Zuqiang Liu, Mathilde Feist, Sara E. Berkey, Congrong Ma, Roshni Ravindranathan, Enyong Dai, Edward J. Roy, Zong Sheng Guo, and David L. Bartlett**

Supplemental Figure 1. The cytotoxicity of oncolytic viruses in MC38 colon cancer cells

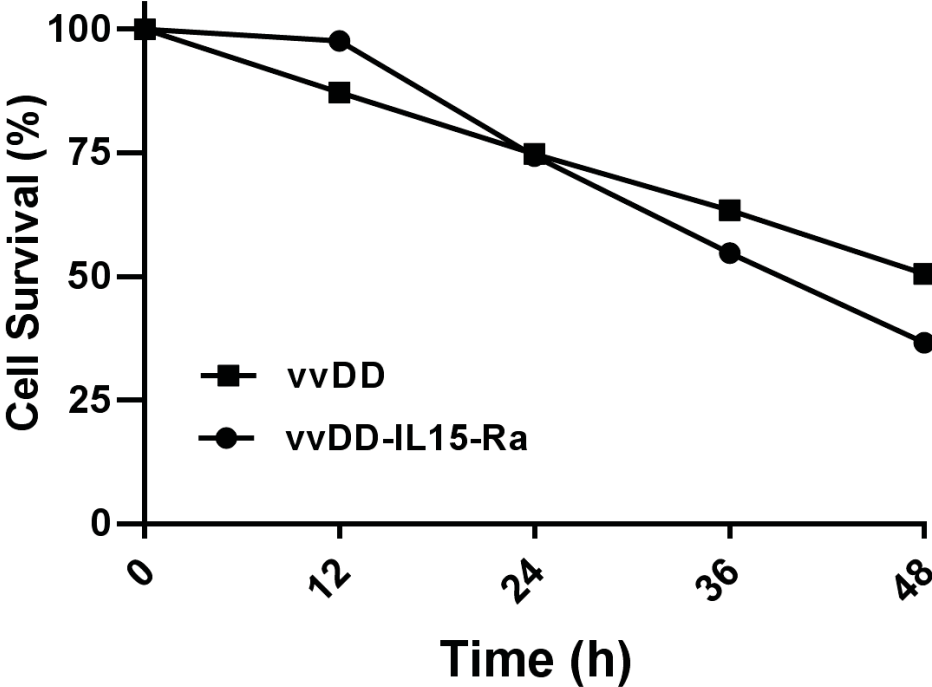

Supplemental Figure 2. PD-1 and PD-L1 expression (RT-qPCR)

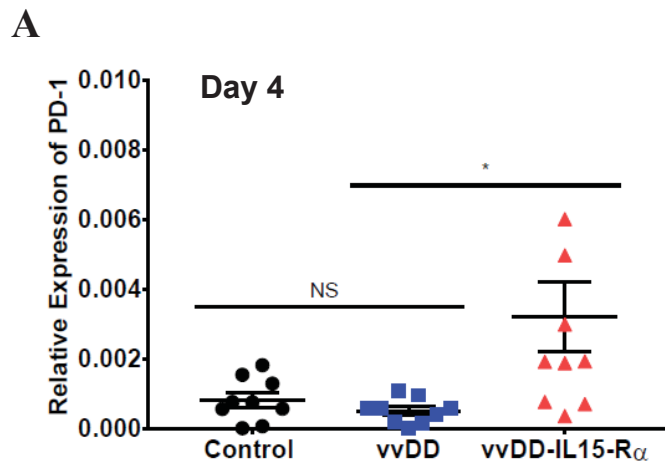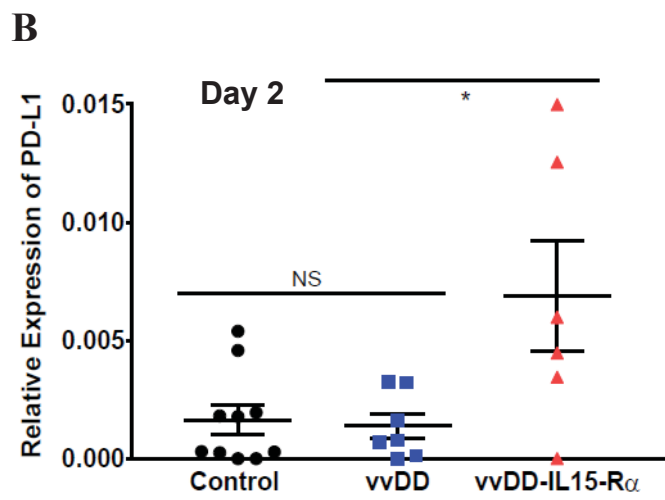

**Supplemental Table 1.** Viral therapeutic and survival data by experimental model

§ Survival data not represented graphically

| Experiment                                      | Treatment Group      | n  | Median survival (days) | <i>p</i> vs Control | <i>p</i> vs vvDD | <i>p</i> vs vvDD-IL15-R $\alpha$ |
|-------------------------------------------------|----------------------|----|------------------------|---------------------|------------------|----------------------------------|
| <b>MC38 Tumor Progression/Survival (Fig. 3)</b> | Control              | 9  | 18                     | -                   | ***              | ***                              |
|                                                 | vvDD                 | 8  | 36                     | ***                 | -                | ***                              |
|                                                 | vvDD-IL15-R $\alpha$ | 5  | > 130                  | ***                 | ***              | -                                |
| <b>ID8 Tumor Progression/Survival (Fig. 4)</b>  | Control              | 10 | 46.5                   | -                   | ****             | ****                             |
|                                                 | vvDD                 | 9  | 87                     | ****                | -                | *                                |
|                                                 | vvDD-IL15-R $\alpha$ | 10 | > 130                  | ****                | *                | -                                |

  

| Experiment                                      | Treatment Group           | n  | Median survival (days) | <i>p</i> vs Control | <i>p</i> vs vvDD-IL15-R $\alpha$ | <i>p</i> vs Virus + $\alpha$ -CD8 | <i>p</i> vs Virus + $\alpha$ -NK cell | <i>p</i> vs Virus + $\alpha$ -CD4 |
|-------------------------------------------------|---------------------------|----|------------------------|---------------------|----------------------------------|-----------------------------------|---------------------------------------|-----------------------------------|
| <b>Selective Immune Depletion (Fig. 5E,F) §</b> | Control                   | 9  | 18                     | -                   | ****                             | ****                              | ****                                  | ****                              |
|                                                 | vvDD-IL15-R $\alpha$      | 10 | > 150                  | ****                | -                                | **                                | NS                                    | NS                                |
|                                                 | Virus + $\alpha$ -CD8     | 10 | 51.5                   | ****                | **                               | -                                 | **                                    | ***                               |
|                                                 | Virus + $\alpha$ -NK cell | 10 | > 150                  | ****                | NS                               | **                                | -                                     | NS                                |
|                                                 | Virus + $\alpha$ -CD4     | 10 | > 150                  | ****                | NS                               | ***                               | NS                                    | -                                 |

  

| Experiment                                      | Treatment Group                      | n | Median survival (days) | <i>p</i> vs Control | <i>p</i> vs $\alpha$ -PD1 | <i>p</i> vs vvDD | <i>p</i> vs vvDD-IL15-R $\alpha$ | <i>p</i> vs vvDD+ $\alpha$ -PD1 | <i>p</i> vs vvDD-IL15-R $\alpha$ + $\alpha$ -PD-1 |
|-------------------------------------------------|--------------------------------------|---|------------------------|---------------------|---------------------------|------------------|----------------------------------|---------------------------------|---------------------------------------------------|
| <b>Combination with PD-1 Blockade (Fig. 6B)</b> | Control                              | 7 | 20                     | -                   | *                         | ***              | ***                              | ***                             | ***                                               |
|                                                 | $\alpha$ -PD1                        | 7 | 27                     | *                   | -                         | NS               | ***                              | **                              | ***                                               |
|                                                 | vvDD                                 | 7 | 31                     | ***                 | NS                        | -                | **                               | *                               | ***                                               |
|                                                 | vvDD-IL15-R $\alpha$                 | 8 | 40                     | ***                 | ***                       | **               | -                                | NS                              | ***                                               |
|                                                 | vvDD + $\alpha$ -PD1                 | 8 | 38.5                   | ***                 | **                        | *                | NS                               | -                               | ***                                               |
|                                                 | vvDD-IL15-R $\alpha$ + $\alpha$ -PD1 | 7 | > 200                  | ***                 | ***                       | ***              | ***                              | ***                             | -                                                 |

**Supplemental Table 2. RT-qPCR Primers Utilized**

| <b>Primer</b>        | <b>Thermo Fisher Scientific primer</b> | <b>Gene symbol</b> | <b>RefSeq</b>                                   | <b>Translated Protein</b>                       |                               |
|----------------------|----------------------------------------|--------------------|-------------------------------------------------|-------------------------------------------------|-------------------------------|
| CD8                  | Mm01182107_g1                          | CD8a               | NM_001081110.2<br>NM_009857.1                   | NP_001074579.1<br>NP_033987.1                   |                               |
| NKp46                | Mm00456776_g1                          | Ncr1               | NM_010746.3                                     | NP_034876.2                                     |                               |
| NKG2D                | Mm00473603_m1                          | Klrk1              | NM_001083322.2<br>NM_001286018.1<br>NM_033078.4 | NP_001076791.1<br>NP_001272947.1<br>NP_149069.1 |                               |
| PD-1                 | Mm1285676_m1                           | Pdcd1              | NM_008798.2                                     | NP_03824.1                                      |                               |
| PDL-1                | Mm00452054_m1                          | CD274              | NM_021893.3                                     | NP_068693.1                                     |                               |
| HPRT¶                | Mm00446968_m1                          | Hprt               | NM_0135562.2                                    | NP_038584.2                                     |                               |
| GAPDH                | Mm99999915_g1                          | Gapdh              | NM_00128926.1<br>NM_008084.3                    | NP_001276655.1<br>NP_032110.1                   |                               |
| <b>Custom Primer</b> |                                        |                    | <b>Forward Sequence</b>                         | <b>Reverse Sequence</b>                         | <b>Reporter sequence</b>      |
| A34R                 | -                                      | -                  | GTCTACAGATAATGCGGTTA<br>TCAGTGT                 | ACTCTCAGATGTCTAGTAT<br>CCGGTCTA                 | CTGGCTCGTAATTAC               |
| IL15-R $\alpha$      | -                                      | -                  | <b>Forward Sequence</b>                         | <b>Reverse Sequence</b>                         | <b>Hybridization Oligomer</b> |
|                      |                                        |                    | TGAGGAACGTGCTGTACCTG                            | GGTCTTCTCCTCCAGCTCCT                            | GAGAGCGGCTGTAAGGAG<br>TG      |

1. ¶ house-keeping genes.
